# Supplementary material for: Design and Application of Portable Centrifuge Inspired by a Hand-Powered Spinning Top
Source: Micromachines (Basel). 2023 Oct 22;14(10):1968. doi: 10.3390/mi14101968 (PMC10609382; doi:10.3390/mi14101968)
Supplement: Supplementary file 1 [file micromachines-14-01968-s001.zip]

Archive with 7 entries (7 files):
- CAD File S1. The connection structure between the warping plate and shaft D.dwg
- CAD File S2. Overall diagram of the structure.dwg
- CAD File S3. Internal transmission.dwg
- CAD File S4. The connection structure between the unloading and the rotating part.dwg
- CAD File S5. Turntable structure.dwg
- CAD File S6. Installation relationship of shaft A, driving wheel, and disc spring.dwg
- Supplementary Materials( description of structure design and operation steps).pdf
